# Supplementary material for: Impact of the estimation equation for GFR on population-based prevalence estimates of kidney dysfunction
Source: Springer Nature journal article supplement (doi:10.1186/s12882-017-0749-5), 2017-11-28

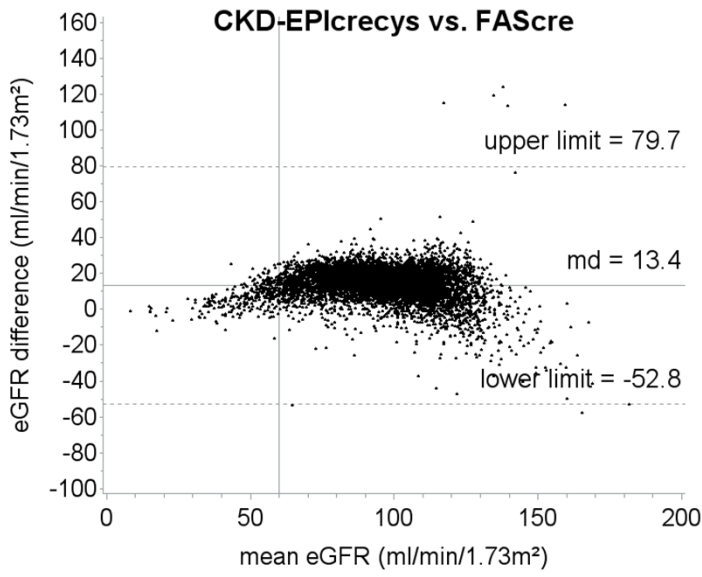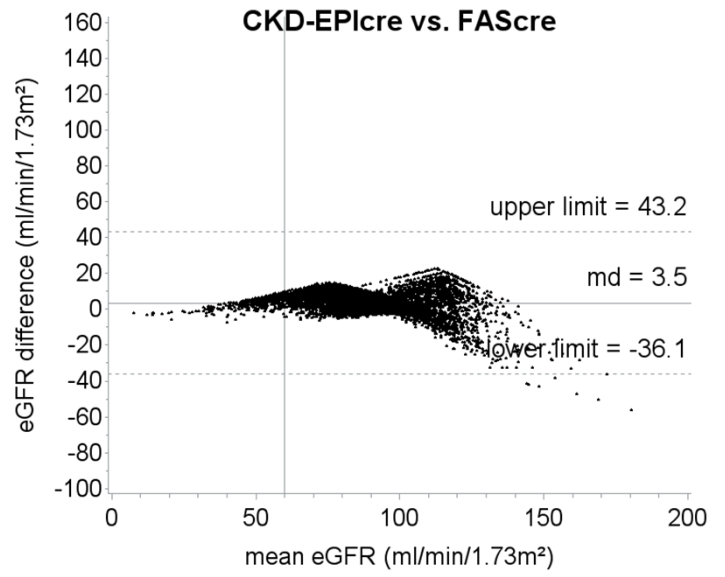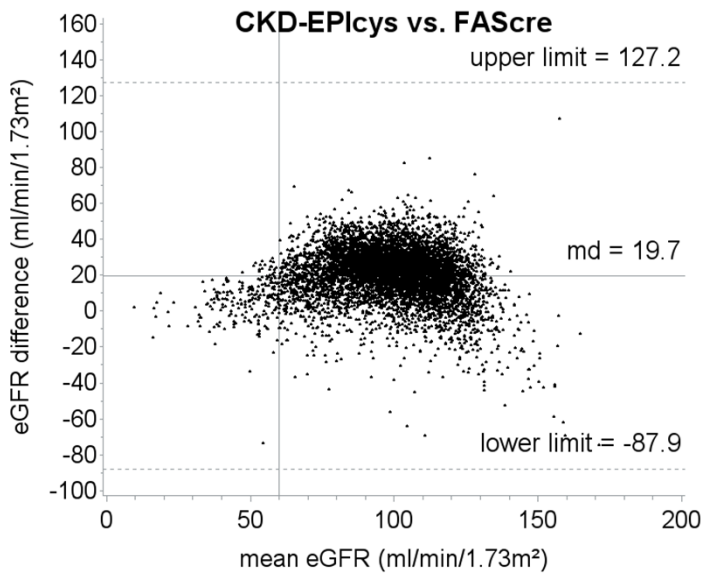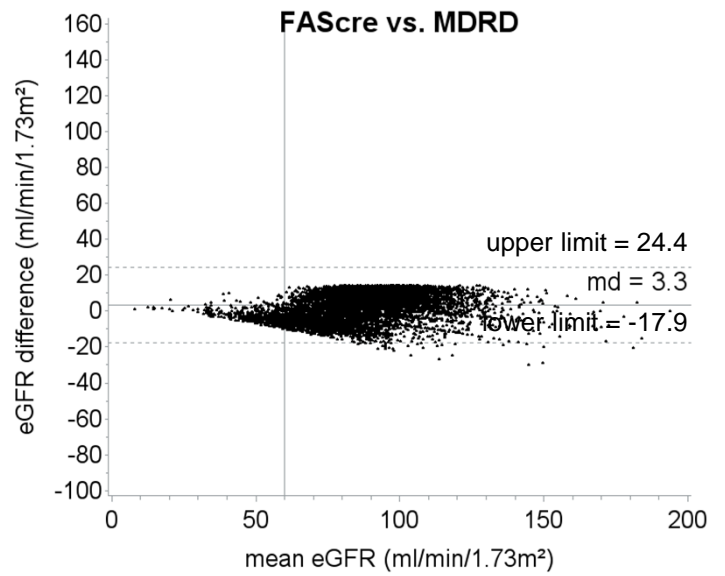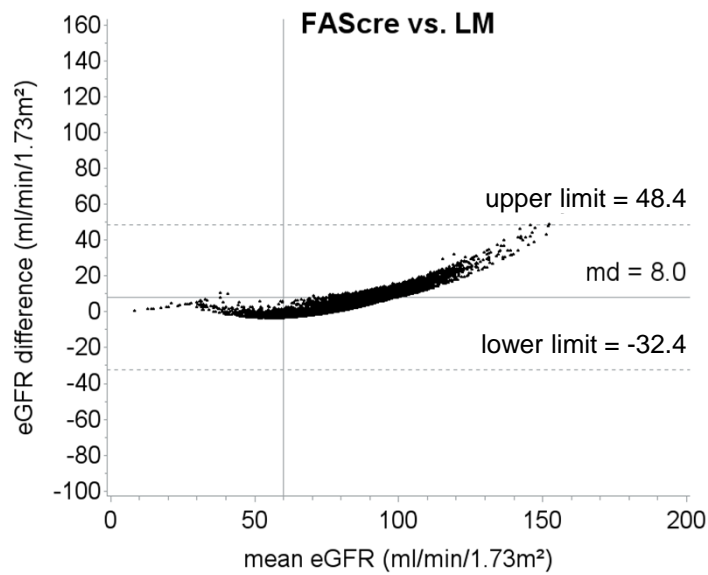

Supplement: MOESM1 [file 15262076]
